# Supplementary material for: Ligand spheres in asymmetric hetero Diels–Alder reactions catalyzed by Cu(ii) box complexes: experiment and modeling
Source: Royal Society of Chemistry journal article supplement (doi:10.1039/c3dt51602d), 2013-09-13
Supplement: c3dt51602d.pdf [file c3dt51602d.pdf]

# Ligand Spheres in asymmetric hetero Diels-Alder reactions catalyzed by Cu(II) box complexes: Experiment and Modeling

V. Umamaheswari,<sup>[a]</sup> Pawel Cias,<sup>[a]</sup> Andreas Pöppl,<sup>[b]</sup> Martin Kaupp,<sup>[c]</sup>  
and Georg Gescheidt <sup>\*[a]</sup>

<sup>[a]</sup> Institute for Physical and Theoretical chemistry, Graz University of Technology,

Stremayrgasse 9, 8010 Graz, Austria

<sup>[b]</sup> Faculty of Physics and Earthscience, University of Leipzig, Linnéstr. 5, D-04103 Leipzig,

Germany

<sup>[c]</sup> Technische Universität Berlin, Fakultät II, Institut für Chemie, Strasse des 17. Juni 135, 10623

Berlin, Germany

## Supplementary Information

### Contents

1. Comparison between the calculated geometry and the X-ray structure of CuboxCl<sub>2</sub>.
2. EPR, ENDOR, and HYSCORE spectra together with the positioning of the tensor axes.
3. Experimental and computed g-factors of the model structures.
4. Experimental/simulated and computed HFC couplings for **LP1**, **LP2** and **LP3** structures.

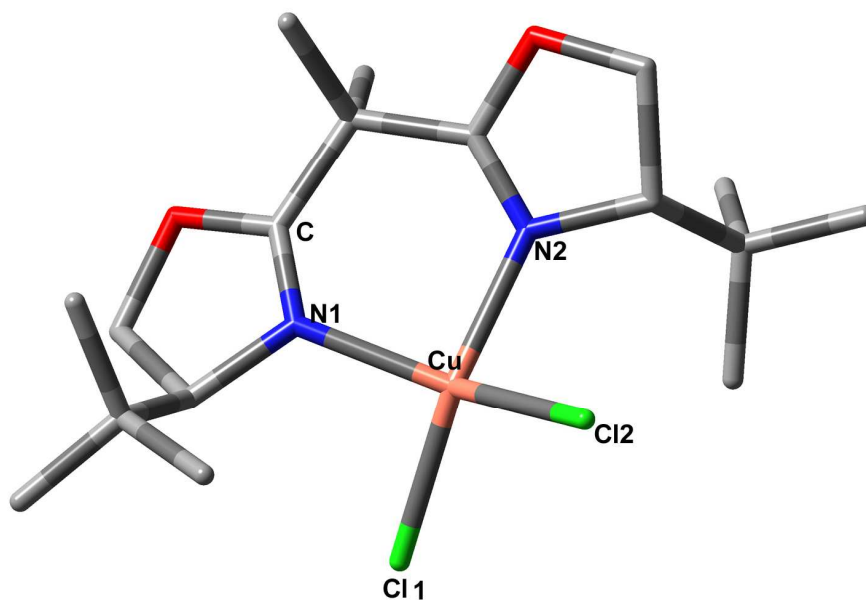

|             | X-ray (Ref 35) | B3LYP/TZVP |
|-------------|----------------|------------|
| Cu-N1       | 198            | 200        |
| Cu-Cl1      | 223            | 224        |
| N1-Cu-N2    | 90.5           | 90.9       |
| Cl1-Cu-Cl2  | 99.8           | 98.9       |
| C-N1-Cu-Cl2 | 108.9          | 109.8      |

**Figure/Table S1:** Experimental and calculated geometry of CuboxCl<sub>2</sub>. Hydrogen atoms are omitted for clarity. Distances are given in pm, angles in °.

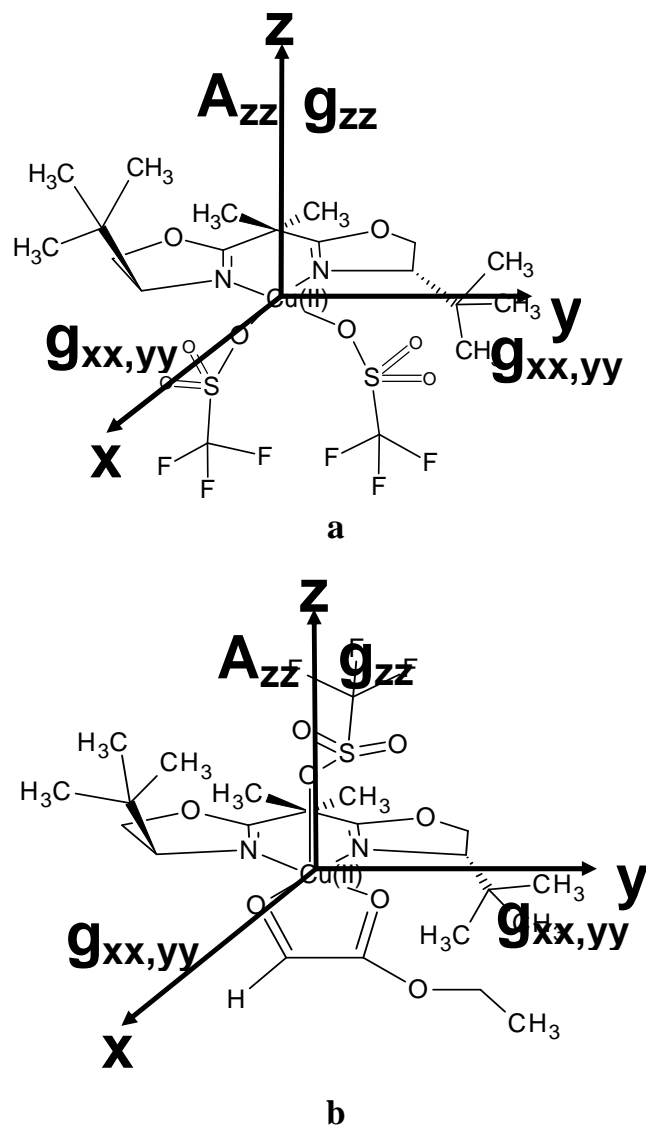

**Figure S2.** Tensor diagram showing the orientation of the principal axes frames with respect to the (a) distorted square planar complex structure for Stage 1 (**S1**) -  $\text{Cu}(\text{OTf})_2/\text{tert-butylbox}$  and (b) distorted square pyramidal complex structure for Stage 2 (**S2**) -  $\text{Cu}(\text{OTf})_2/\text{tert-butylbox}$  + ethyl glyoxylate and Stage 3 (**S3**) -  $\text{Cu}(\text{OTf})_2/\text{tert-butylbox}$  + ethyl glyoxylate + 1,3-cyclohexadiene (1,3-cyclohexadiene is not included in the picture since it is not directly coordinated to the Cu(II) center)

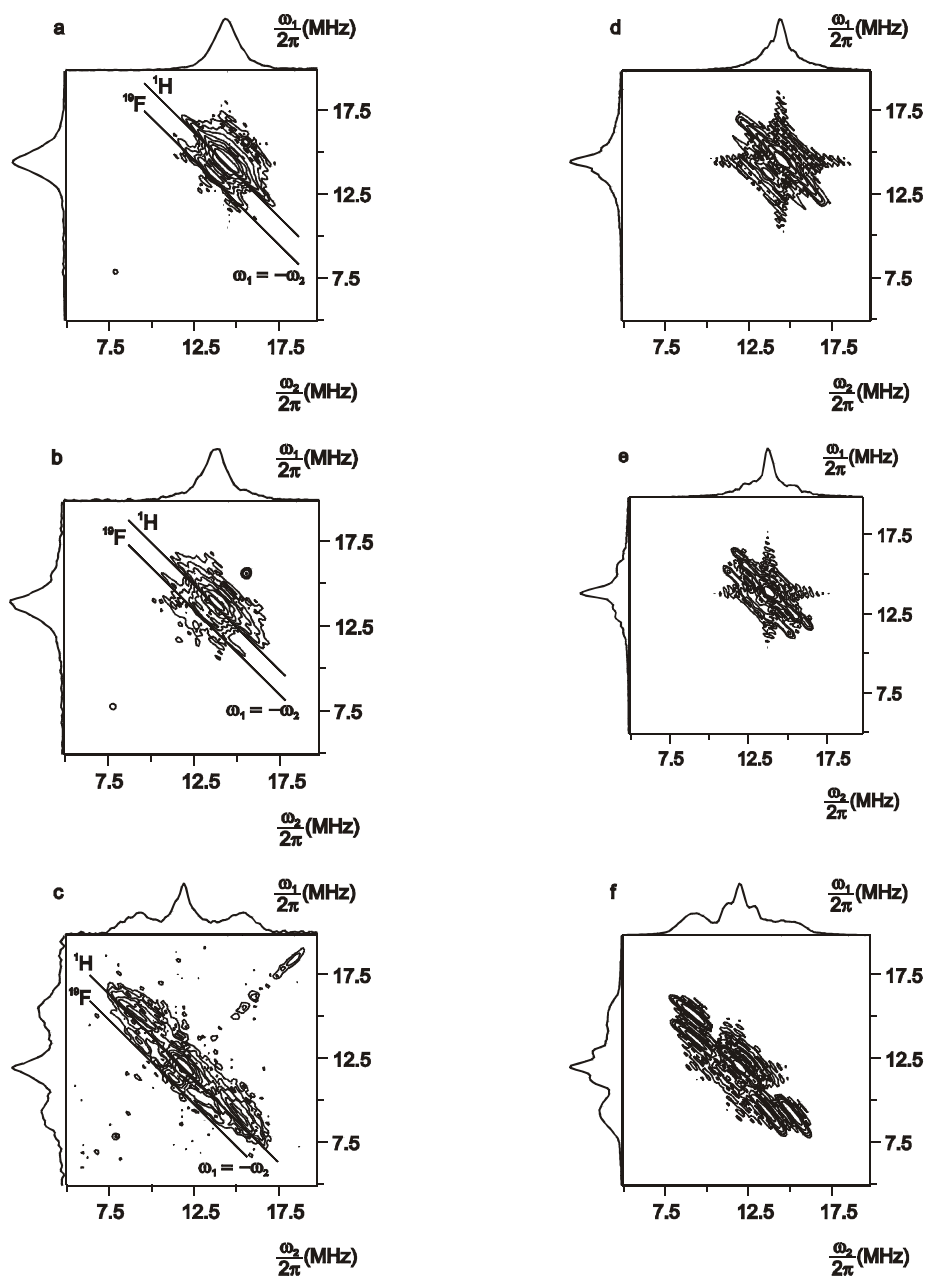

**Figure S3.** Added X- band HYSCORE spectra of stage 1 (S1) -  $\text{Cu}(\text{OTf})_2/\text{tert-butylbox}$ , measured at 4 K, (a) 339.5 mT,  $\tau = 104 + 160 + 32$  ns (b) 325.5 mT,  $\tau = 104 + 160 + 32$  ns (c) 281.5 mT,  $\tau = 160 + 40$  ns at 4 K, (a, b, c – Experimental) and (d, e, f – Simulated)

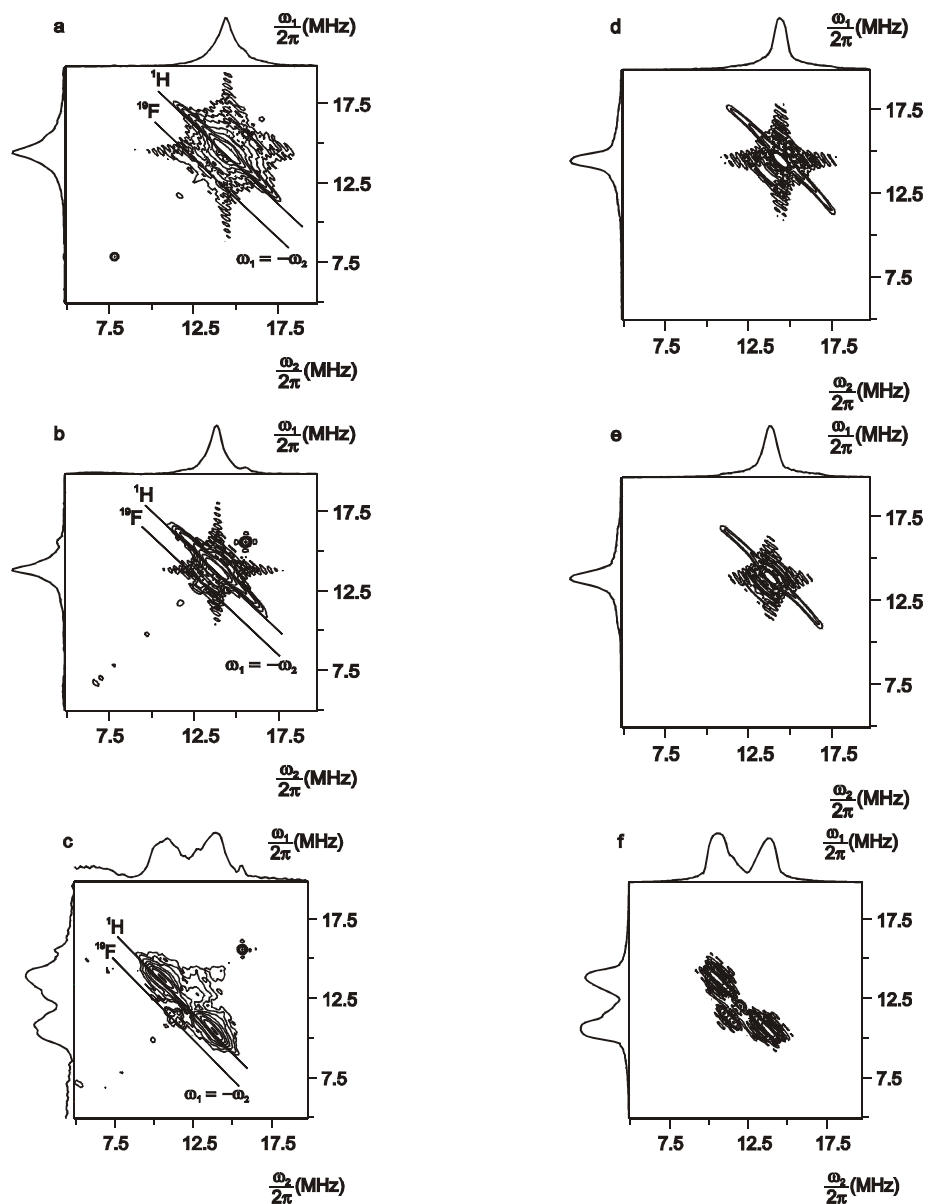

**Figure S4.** X- band HYSCORE spectra of stage 3 (S3) - Cu(OTf)<sub>2</sub>/tert-butylbox + ethyl glyoxylate + 1,3-cyclohexadiene (a) 339.5 mT,  $\tau = 104 + 160 + 32$  ns (b) 325.5 mT,  $\tau = 104 + 160 + 32$  ns (c) 281.5 mT,  $\tau = 160$  ns at 4 K, (a, b, c – Experimental) and (d, e, f – Simulated)

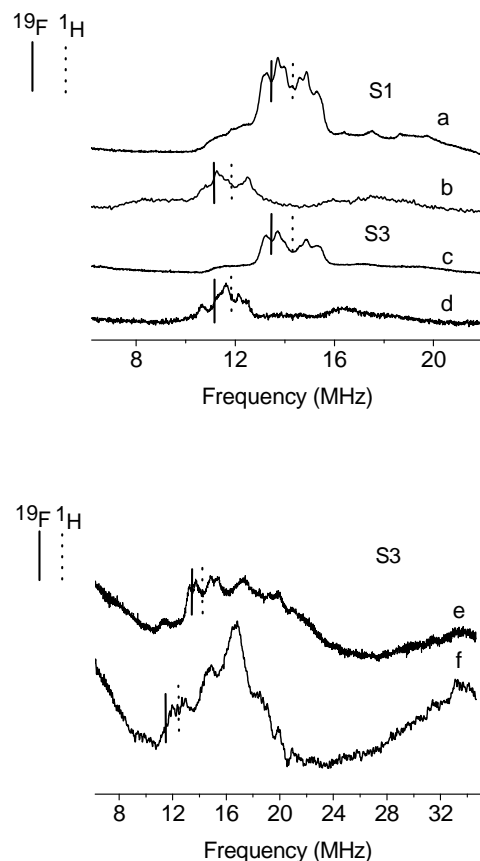

**Figure S5.** X- band Experimental Davies ENDOR spectra of **S1** – Cu(OTf)<sub>2</sub>/tert-butylbox (a – 335.4 mT and b – 278.5 mT), and **S3** - Cu(OTf)<sub>2</sub>/tert-butylbox + ethyl glyoxylate + 1,3-cyclohexadiene (c – 335.4, d – 278.5 mT), measured at 4 K with long microwave pulses of  $t_{\pi/2} = 96$  and  $t_{\pi} = 192$  ns, and (e – 335.4 mT) and (f – 290 mT) of **S3** measured with short microwave pulses  $t_{\pi/2} = 16$  and  $t_{\pi} = 32$  ns

This hf contrast selective ENDOR experiments for **S3** prove unambiguously the presence of broad <sup>14</sup>N ENDOR signals in the range 16 MHz – 24 MHz (spectrum in Fig. S5 /e/ recorded at 335.4 mT) and 16 MHz – 20 MHz (Fig. S5 /f/ recorded at 290.0 mT). The data provide a rough estimate of  $A_{\parallel}^N \approx 48$  MHz and  $A_{\perp}^N \approx 32$  MHz for the <sup>14</sup>N hfc parameters in sample III. Note that the largest <sup>14</sup>N hfc is observed in the ENDOR spectrum taken at 335.4 mT (Fig. S5 /e/). Therefore, the  $A_{\parallel}^N$  principal axis of the <sup>14</sup>N hfc tensor lies within the x-y plane of the Cu(II) g tensor. In the same way we may likewise assign the broad baseline signals ranging from 17 MHz to 20 MHz in the ENDOR spectra of sample I (Fig. S5 /a and b/) to <sup>14</sup>N signals yielding hfc estimates of  $A_{\parallel}^N \approx 40$  MHz and  $A_{\perp}^N \approx 34$  MHz for the respective hfc parameters.

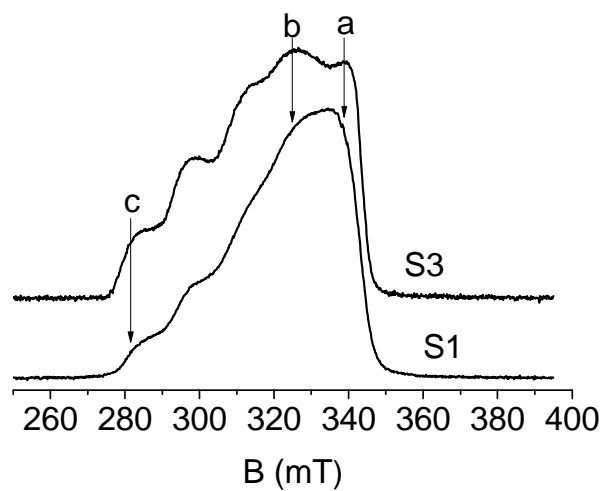

**Figure S6.** X- band two pulse field-swept ESE spectra measured with short pulses  $\pi/2 = 16$  ns and  $\pi = 32$  ns, and the pulse delay of  $\tau = 800$  ns at 4 K, of **S1** -  $\text{Cu}(\text{OTf})_2/\text{tert}$ -butylbox and **S3** -  $\text{Cu}(\text{OTf})_2/\text{tert}$ -butylbox + ethyl glyoxylate (**1**) + 1,3 - cyclohexadiene (**2**), the arrows with a, b and c represents the fields 339.5 mT, 325.5 mT and 281.5 mT respectively, at which the HYSCORE spectra were measured.

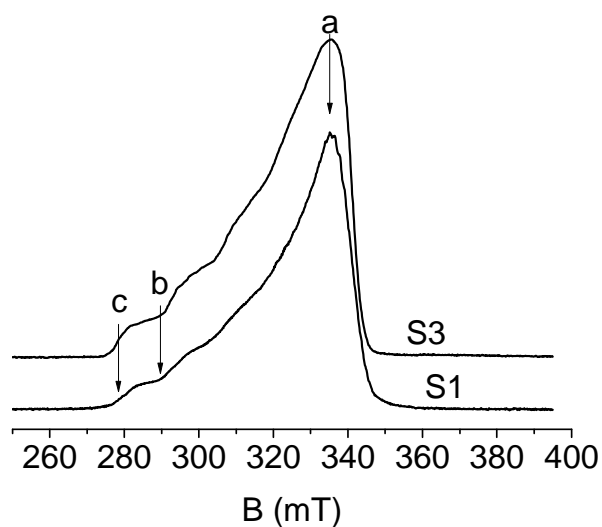

**Figure S7.** X- band two pulse field-swept ESE spectra measured with the selective microwave pulses of  $t_{\pi/2} = 96$  ns and  $t_{\pi} = 192$  ns, and with the pulse delay of  $\tau = 1200$  ns, at 4 K, of S1 - Cu(OTf)<sub>2</sub>/*tert*-butylbox and Stage 3 (S3) - Cu(OTf)<sub>2</sub>/*tert*-butylbox + ethyl glyoxylate (**1**) + 1,3 - cyclohexadiene (**2**), the arrows with a, b and c represents the fields 335.4 mT, 290 mT and 278.5 mT respectively, at which the ENDOR spectra were measured



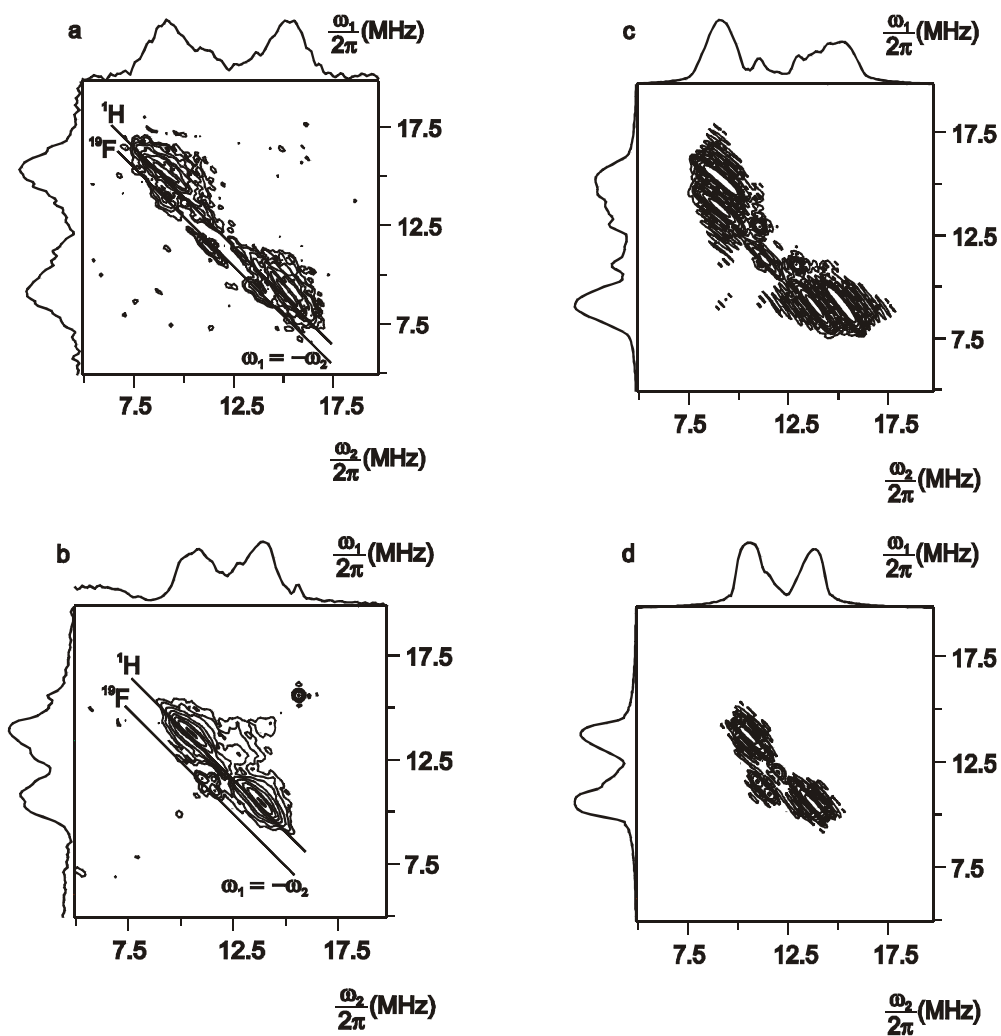

**Figure S8.** X- band HYSORE spectra of **S1** -  $\text{Cu}(\text{OTf})_2/\text{tert}$ -butylbox (a – Experimental, c – Simulated) and **S3** -  $\text{Cu}(\text{OTf})_2/\text{tert}$ -butylbox + Ethyl glyoxylate + 1,3 - Cyclohexadiene (b – Experimental, d – Simulated), measured at the  $g_{zz}$  Cu(II) EPR spectral position 281.5 mT at 4 K, with  $\tau = 160$  ns

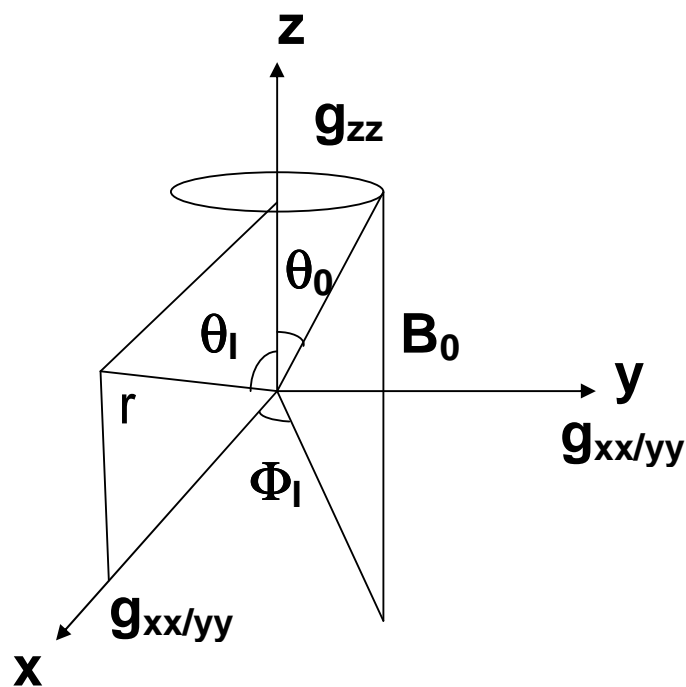

**Figure S9.** Vector diagram showing the relationship between the external field  $B_0$  and the vector  $r$  joining the electron spin and the nucleus ( $^1\text{H}$  or  $^{19}\text{F}$ ) which lies in the  $xz$  plane.  $r$  is at an angle of  $\theta_l$  to the  $z$  axis. The  $xyz$  coordinate frame corresponds to the  $g$  tensor frame.  $\theta_0$  is the angle between the external magnetic field  $B_0$  and the  $g_{zz}$  axis.  $\Phi_l$  is the azimuthal angle from  $z$  between the  $xz$  plane and the  $zB_0$  plane.

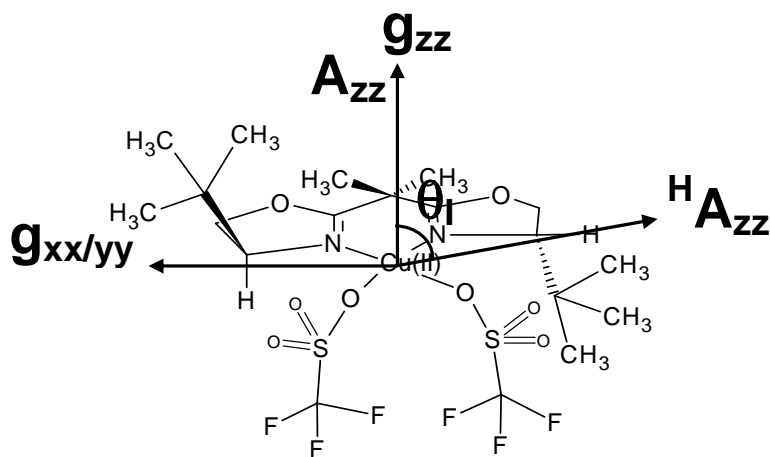

**Figure S10.** Schematic drawing of the  $\text{Cu}(\text{OTf})_2/\text{tert}$ -butylbox complex (**S1**) together with the vector diagram showing the relationship between the  $\mathbf{g}$  tensor frame and the  $z$  axis of the proton hf tensor. The  $z$  axis of the proton hyperfine tensor is shown to be perpendicular to the  $\mathbf{g}_{zz}$  axis. The  $\mathbf{g}_{xx/yy}$  and  $\mathbf{g}_{zz}$  axes of the Cu(II)  $\mathbf{g}$  tensor frame are respectively parallel and perpendicular to the complex plane containing Cu(II) ion, the two equatorially coordinated imine nitrogen atoms from the oxazoline rings of the *tert*-butylbox ligand, and the two equatorially coordinated oxygen atoms from the triflate ( $-\text{O}-\text{SO}_2-\text{CF}_3$ ) (which are slightly tilted about  $26^\circ$  from the Cu(II) plane).

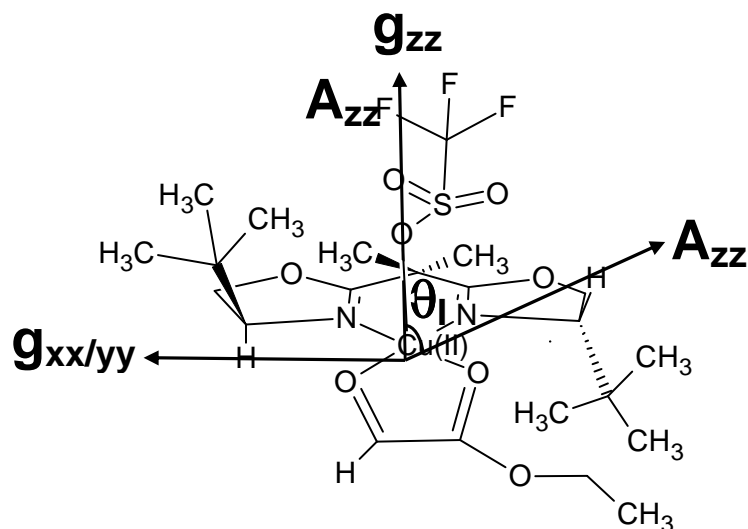

**Figure S11.** Schematic drawing of the  $\text{Cu}(\text{OTf})_2/\text{tert}$ -butylbox + ethyl glyoxylate complex (**S2**) together with a vector diagram showing the relationship between the  $g$  tensor frame and the  $z$  axis of the proton hf tensor. The  $z$  axis of the proton hyperfine tensor is shown to be at an angle of  $51^\circ$  from the  $g_{zz}$  axis. The  $g_{xx/yy}$  and  $g_{zz}$  axis of the Cu(II)  $g$  tensor frame are respectively parallel and perpendicular to the complex plane containing Cu(II) ion, two equatorially coordinated imine nitrogen atoms from the oxazoline rings of the *tert*-butylbox ligand and the two equatorially coordinated oxygen atoms from the dienophile (which are slightly tilted about  $26^\circ$  from the Cu(II) plane). Here the  $-\text{OTf}$  ligands are axially coordinated to the Cu(II), through the sulphonic oxygen atom and is perpendicular to the complex plane containing Cu(II), and parallel to  $g_{zz}$  axis.

|    | $g_{\perp}$ |       | $g_{\parallel}$ |       |
|----|-------------|-------|-----------------|-------|
|    | Exp         | Calc  | Exp             | Calc  |
| S1 | 2.077       | 2.067 | 2.303           | 2.208 |
| S2 | 2.068       | 2.063 | 2.304           | 2.195 |
| S3 | 2.080       | 2.072 | 2.323           | 2.198 |

**Table S12.** Comparison of calculated and experimental g-factors for **S1**, **S2** and **S3** structures.

|    | $A_{\perp}$ |       |        |       | $A_{\parallel}$ |        |        |       | $A_{\text{iso}}$ |       |        |      |
|----|-------------|-------|--------|-------|-----------------|--------|--------|-------|------------------|-------|--------|------|
|    | LP1         | LP2   | LP3/S2 | sim   | LP1             | LP2    | LP3/S2 | sim   | LP1              | LP2   | LP3/S2 | sim  |
| Cu | 91.4        | 20.0  | 52.8   | 38.0  | -411.2          | -498.5 | -536.6 | 424.0 | -                | -     | -      | -    |
| N  | 25.6        | 33.0  | 35.7   | 35.0  | 35.1            | 44.7   | 48.6   | 35.0  | 28.6             | 37.1  | 40.3   | 35.0 |
| H  | -1.10       | -0.48 | -1.42  | -1.46 | -1.30           | 0.83   | 4.66   | 6.82  | 0.06             | -0.04 | 0.50   | 1.3  |
| F  | 1.58        | 0.07  | -0.59  | -0.73 | -5.08           | 3.81   | 1.19   | 1.46  | -2.61            | 1.11  | 0.00   | 0.00 |

**Table S13.** Comparison of calculated and experimental/simulated HFC couplings of Cu, N, relevant F and H nuclei for **LP1**, **LP2** and **LP3** structures.
